# Supplementary material
Source: PubMed Central journal article supplement (PMC6803257)
Supplement: JVI.02041-18-s0001.pdf [file JVI.02041-18-s0001.pdf]

## Fc gamma receptor polymorphisms modulated the vaccine effect on HIV-1 risk in the HVTN 505 HIV vaccine trial

Li et al

### Supplementary Figure

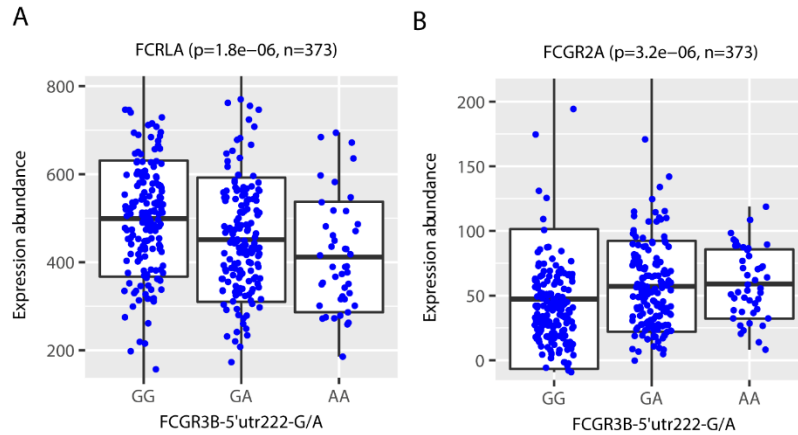

**Figure S1.** Associations of the *FCGR3B* SNP FCGR3B-5'utr222-G/A (rs34085961) with (A) *FCRLA* and (B) *FCGR2A* expression based on B cell expression data from (1).

1. Lappalainen T, Sammeth M, Friedlander MR, t Hoen PA, Monlong J, Rivas MA, et al. 2013. Transcriptome and genome sequencing uncovers functional variation in humans. *Nature* 501:506-11.

## Supplementary Tables

**Table S1.** Assessment of whether and how each FcγR SNP modified the vaccine/placebo hazard ratio of HIV-1 acquisition in HVTN 505

| SNP                                     | Genotype | # Vaccinees<br>/# Placebos | OR   | 95% CI        | Interaction Test |         |               |                   |
|-----------------------------------------|----------|----------------------------|------|---------------|------------------|---------|---------------|-------------------|
|                                         |          |                            |      |               | P-value          | P-value | FDR (Q-value) | P <sub>FWER</sub> |
| CD16_01_448                             | GG       | 8::7                       | 0.89 | (0.26, 3.07)  | 0.860            | 0.477   | 0.758         | 0.995             |
|                                         | GT/TT    | 19::14                     | 1.6  | (0.72, 3.54)  | 0.245            |         |               |                   |
| CD16_02_44<br>(FCGR3B-5'utr44-T/A)      | TT       | 10::16                     | 0.66 | (0.29, 1.5)   | 0.317            | 0.033   | 0.178         | 0.408             |
|                                         | TA/AA    | 14::5                      | 2.84 | (0.98, 8.18)  | 0.054            |         |               |                   |
| CD16_02_99<br>(FCGR3B-5'utr99-C/G)      | CC       | 9::14                      | 0.68 | (0.29, 1.6)   | 0.375            | 0.032   | 0.178         | 0.408             |
|                                         | CG/GG    | 18::7                      | 2.6  | (1.06, 6.37)  | 0.036            |         |               |                   |
| CD16_02_222<br>(FCGR3B-5'utr222-G/A)    | GG       | 10::16                     | 0.65 | (0.29, 1.49)  | 0.308            | 0.023   | 0.178         | 0.297             |
|                                         | GA/AA    | 15::5                      | 3.07 | (1.07, 8.75)  | 0.036            |         |               |                   |
| CD16_02_385                             | AA       | 8::13                      | 0.62 | (0.24, 1.59)  | 0.324            | 0.059   | 0.195         | 0.593             |
|                                         | AC/CC    | 17::8                      | 2.25 | (0.91, 5.54)  | 0.078            |         |               |                   |
| CD16_02_425                             | TT       | 8::12                      | 0.7  | (0.27, 1.82)  | 0.467            | 0.154   | 0.369         | 0.884             |
|                                         | TG/GG    | 16::9                      | 1.82 | (0.76, 4.33)  | 0.176            |         |               |                   |
| CD16_02_473                             | GG       | 12::14                     | 0.84 | (0.37, 1.87)  | 0.665            | 0.119   | 0.338         | 0.861             |
|                                         | GA/AA    | 14::7                      | 2.23 | (0.87, 5.75)  | 0.095            |         |               |                   |
| CD16_09_626                             | TT       | 15::6                      | 2.32 | (0.89, 6.08)  | 0.087            | 0.132   | 0.338         | 0.873             |
|                                         | TG/GG    | 12::15                     | 0.88 | (0.4, 1.95)   | 0.759            |         |               |                   |
| CD16_10_332                             | TT       | 23::17                     | 1.36 | (0.71, 2.61)  | 0.360            | 0.946   | 0.970         | 0.999             |
|                                         | TC/CC    | 3::3                       | 1.27 | (0.23, 7.08)  | 0.782            |         |               |                   |
| CD16_10_885                             | GG       | 7::5                       | 1.35 | (0.39, 4.63)  | 0.636            | 0.980   | 0.977         | 0.999             |
|                                         | GT/TT    | 20::16                     | 1.32 | (0.66, 2.65)  | 0.429            |         |               |                   |
| CD16_13_268                             | GG       | 11::11                     | 0.77 | (0.28, 2.1)   | 0.611            | 0.186   | 0.425         | 0.920             |
|                                         | GA/AA    | 16::10                     | 2.15 | (0.84, 5.49)  | 0.111            |         |               |                   |
| CD32_04_275                             | CC       | 22::16                     | 1.36 | (0.7, 2.65)   | 0.368            | 0.885   | 0.942         | 0.999             |
|                                         | CT/TT    | 5::5                       | 1.22 | (0.33, 4.5)   | 0.766            |         |               |                   |
| CD32_04_276                             | AA       | 21::15                     | 1.37 | (0.69, 2.72)  | 0.364            | 0.853   | 0.942         | 0.999             |
|                                         | AG/GG    | 6::6                       | 1.21 | (0.38, 3.89)  | 0.751            |         |               |                   |
| CD32_04_604                             | TT       | 22::16                     | 1.36 | (0.7, 2.65)   | 0.368            | 0.885   | 0.961         | 0.999             |
|                                         | TC/CC    | 5::5                       | 1.22 | (0.33, 4.5)   | 0.766            |         |               |                   |
| CD32_05_423                             | GG       | 15::14                     | 1.14 | (0.52, 2.49)  | 0.748            | 0.553   | 0.825         | 0.997             |
|                                         | GA/AA    | 12::7                      | 1.7  | (0.62, 4.65)  | 0.304            |         |               |                   |
| CD32_06_126<br>(FCGR2C-intron6-126-C/T) | CC       | 15::17                     | 0.94 | (0.46, 1.92)  | 0.857            | 0.131   | 0.338         | 0.873             |
|                                         | CT/TT    | 11::4                      | 2.68 | (0.83, 8.62)  | 0.099            |         |               |                   |
| CD32_06_197<br>(FCGR2C-intron6-197-G/A) | GG       | 19::9                      | 2.33 | (0.98, 5.55)  | 0.056            | 0.055   | 0.195         | 0.587             |
|                                         | GA/AA    | 7::12                      | 0.53 | (0.17, 1.6)   | 0.260            |         |               |                   |
| CD32_06_441<br>(FCGR2C-exon6-441-C/T)   | CC       | 17::20                     | 0.86 | (0.44, 1.7)   | 0.667            | 0.034   | 0.178         | 0.408             |
|                                         | CT/TT    | 9::1                       | 9.79 | (1.17, 81.78) | 0.035            |         |               |                   |
| CD32_06_590<br>(FCGR2C-intron6-590-G/A) | GG       | 17::20                     | 0.86 | (0.44, 1.7)   | 0.667            | 0.034   | 0.182         | 0.408             |
|                                         | GA/AA    | 9::1                       | 9.79 | (1.17, 81.78) | 0.035            |         |               |                   |
| CD32_07_86                              | GG       | 22::16                     | 1.36 | (0.7, 2.65)   | 0.368            | 0.885   | 0.970         | 0.999             |
|                                         | GA/AA    | 5::5                       | 1.22 | (0.33, 4.5)   | 0.766            |         |               |                   |
| CD32_07_232                             | GG       | 9::5                       | 2.05 | (0.66, 6.37)  | 0.213            | 0.369   | 0.656         | 0.987             |
|                                         | GA/AA    | 18::16                     | 1.12 | (0.56, 2.25)  | 0.753            |         |               |                   |
| CD32_11_395                             | GG       | 20::16                     | 1.21 | (0.61, 2.41)  | 0.580            | 0.601   | 0.859         | 0.998             |
|                                         | GA/AA    | 7::5                       | 1.75 | (0.53, 5.82)  | 0.359            |         |               |                   |
| CD32_11_454                             | AA       | 10::12                     | 0.88 | (0.37, 2.09)  | 0.767            | 0.198   | 0.425         | 0.927             |
|                                         | AG/GG    | 17::9                      | 1.92 | (0.84, 4.41)  | 0.125            |         |               |                   |
| CD32_12_392                             | GG       | 24::18                     | 1.39 | (0.74, 2.63)  | 0.309            | 0.689   | 0.901         | 0.999             |
|                                         | GA/AA    | 3::3                       | 0.97 | (0.18, 5.1)   | 0.970            |         |               |                   |
| CD32_12_477                             | CC       | 9::11                      | 0.75 | (0.29, 1.93)  | 0.550            | 0.127   | 0.338         | 0.873             |
|                                         | CT/TT    | 18::10                     | 2.04 | (0.89, 4.69)  | 0.091            |         |               |                   |
| CD32_13_258                             | AA       | 22::16                     | 1.36 | (0.7, 2.65)   | 0.368            | 0.885   | 0.970         | 0.999             |
|                                         | AG/GG    | 5::5                       | 1.22 | (0.33, 4.5)   | 0.766            |         |               |                   |
| CD32_13_645                             | GG       | 10::12                     | 0.91 | (0.38, 2.2)   | 0.840            | 0.256   | 0.521         | 0.964             |
|                                         | GA/AA    | 17::9                      | 1.84 | (0.8, 4.24)   | 0.150            |         |               |                   |
| CD32_14_126                             | CC       | 14::14                     | 1.08 | (0.5, 2.34)   | 0.838            | 0.422   | 0.705         | 0.990             |

|                           |       |        |      |               |       |       |       |       |
|---------------------------|-------|--------|------|---------------|-------|-------|-------|-------|
|                           | CT/TT | 13::7  | 1.79 | (0.69, 4.6)   | 0.229 |       |       |       |
| CD32_14_261               | TT    | 20::13 | 1.72 | (0.8, 3.68)   | 0.164 | 0.274 | 0.526 | 0.964 |
|                           | TC/CC | 7::8   | 0.77 | (0.25, 2.4)   | 0.657 |       |       |       |
| CD32_14_352               | TT    | 9::8   | 1.12 | (0.4, 3.12)   | 0.823 | 0.694 | 0.901 | 0.999 |
|                           | TG/GG | 18::13 | 1.46 | (0.68, 3.11)  | 0.328 |       |       |       |
| CD32_14_447               | GG    | 17::15 | 1.23 | (0.58, 2.61)  | 0.591 | 0.742 | 0.926 | 0.999 |
|                           | GT/TT | 10::6  | 1.56 | (0.51, 4.76)  | 0.437 |       |       |       |
| CD32_15_403               | CC    | 15::18 | 0.88 | (0.43, 1.78)  | 0.719 | 0.045 | 0.182 | 0.508 |
| (FCGR2C-intron15-403-C/T) | CT/TT | 12::3  | 3.92 | (1.08, 14.16) | 0.037 |       |       |       |
| CD32_15_433               | GG    | 13::17 | 0.82 | (0.39, 1.73)  | 0.601 | 0.042 | 0.182 | 0.487 |
| (FCGR2C-intron15-433-G/A) | GA/AA | 14::4  | 3.33 | (1.08, 10.29) | 0.036 |       |       |       |

**Table S2.** Assessment of whether and how each FcγR SNP modified the inverse correlation of Env-specific CD8 with HIV-1 infection risk in HVTN 505 reported by Janes et al. (1).

| SNP                                     | Genotype | # case<br>/#controls | OR   | 95% CI       | P-value | Interaction Test |              |                   |
|-----------------------------------------|----------|----------------------|------|--------------|---------|------------------|--------------|-------------------|
|                                         |          |                      |      |              |         | P-value          | FDR(Q-value) | P <sub>FWER</sub> |
| CD16_01_448                             | GG       | 6/55                 | 0.47 | (0.17, 1.3)  | 0.148   | 0.255            | 0.655        | 0.982             |
|                                         | GT/TT    | 19/70                | 0.22 | (0.09, 0.51) | 0.0005  |                  |              |                   |
| CD16_02_44<br>(FCGR3B-5'utr44-T/A)      | TT       | 10/44                | 0.19 | (0.06, 0.6)  | 0.005   | 0.377            | 0.677        | 0.996             |
|                                         | TA/AA    | 12/80                | 0.36 | (0.15, 0.84) | 0.018   |                  |              |                   |
| CD16_02_99<br>(FCGR3B-5'utr99-C/G)      | CC       | 9/39                 | 0.18 | (0.05, 0.61) | 0.006   | 0.37             | 0.677        | 0.996             |
|                                         | CG/GG    | 16/85                | 0.35 | (0.16, 0.75) | 0.008   |                  |              |                   |
| CD16_02_222<br>(FCGR3B-5'utr222-G/A)    | GG       | 10/44                | 0.18 | (0.05, 0.58) | 0.004   | 0.372            | 0.677        | 0.996             |
|                                         | GA/AA    | 13/80                | 0.34 | (0.15, 0.8)  | 0.013   |                  |              |                   |
| CD16_02_385                             | AA       | 8/39                 | 0.16 | (0.04, 0.64) | 0.01    | 0.287            | 0.655        | 0.985             |
|                                         | AC/CC    | 15/85                | 0.37 | (0.17, 0.78) | 0.009   |                  |              |                   |
| CD16_02_425                             | TT       | 8/37                 | 0.07 | (0.01, 0.52) | 0.009   | 0.109            | 0.544        | 0.826             |
|                                         | TG/GG    | 14/88                | 0.4  | (0.19, 0.85) | 0.016   |                  |              |                   |
| CD16_02_473                             | GG       | 10/42                | 0.13 | (0.03, 0.55) | 0.006   | 0.194            | 0.655        | 0.960             |
|                                         | GA/AA    | 14/83                | 0.38 | (0.17, 0.81) | 0.013   |                  |              |                   |
| CD16_09_626                             | TT       | 14/53                | 0.42 | (0.2, 0.9)   | 0.025   | 0.205            | 0.655        | 0.969             |
|                                         | TG/GG    | 11/71                | 0.16 | (0.05, 0.58) | 0.005   |                  |              |                   |
| CD16_10_332                             | TT       | 21/99                | 0.32 | (0.16, 0.63) | 0.001   | 0.89             | 0.943        | 1.000             |
|                                         | TC/CC    | 3/24                 | 0.28 | (0.05, 1.68) | 0.163   |                  |              |                   |
| CD16_10_885                             | GG       | 5/35                 | 0.22 | (0.05, 1)    | 0.049   | 0.632            | 0.843        | 0.999             |
|                                         | GT/TT    | 20/90                | 0.33 | (0.16, 0.66) | 0.002   |                  |              |                   |
| CD16_13_268                             | GG       | 9/73                 | 0.48 | (0.21, 1.09) | 0.078   | 0.151            | 0.655        | 0.922             |
|                                         | GA/AA    | 16/52                | 0.19 | (0.07, 0.5)  | 0.001   |                  |              |                   |
| CD32_04_275                             | CC       | 20/102               | 0.39 | (0.21, 0.73) | 0.003   | 0.058            | 0.354        | 0.626             |
|                                         | CT/TT    | 5/23                 | 0.01 | (0, 0.41)    | 0.016   |                  |              |                   |
| CD32_04_276                             | AA       | 19/102               | 0.4  | (0.21, 0.75) | 0.004   | 0.05             | 0.354        | 0.573             |
|                                         | AG/GG    | 6/23                 | 0.01 | (0, 0.37)    | 0.014   |                  |              |                   |
| CD32_04_604                             | TT       | 20/102               | 0.39 | (0.21, 0.73) | 0.003   | 0.058            | 0.425        | 0.626             |
|                                         | TC/CC    | 5/23                 | 0.01 | (0, 0.41)    | 0.016   |                  |              |                   |
| CD32_05_423                             | GG       | 14/84                | 0.37 | (0.16, 0.82) | 0.014   | 0.51             | 0.787        | 0.999             |
|                                         | GA/AA    | 11/41                | 0.23 | (0.08, 0.66) | 0.006   |                  |              |                   |
| CD32_06_126<br>(FCGR2C-intron6-126-C/T) | CC       | 14/69                | 0.3  | (0.13, 0.67) | 0.003   | 0.941            | 0.958        | 1.000             |
|                                         | CT/TT    | 10/56                | 0.31 | (0.11, 0.88) | 0.028   |                  |              |                   |
| CD32_06_197<br>(FCGR2C-intron6-197-G/A) | GG       | 17/73                | 0.29 | (0.13, 0.65) | 0.003   | 0.839            | 0.938        | 1.000             |
|                                         | GA/AA    | 7/52                 | 0.33 | (0.12, 0.95) | 0.04    |                  |              |                   |
| CD32_06_441<br>(FCGR2C-exon6-441-C/T)   | CC       | 16/82                | 0.24 | (0.1, 0.55)  | 0.001   | 0.313            | 0.655        | 0.989             |
|                                         | CT/TT    | 8/43                 | 0.47 | (0.17, 1.31) | 0.148   |                  |              |                   |
| CD32_06_590<br>(FCGR2C-intron6-590-G/A) | GG       | 16/82                | 0.24 | (0.1, 0.55)  | 0.001   | 0.313            | 0.677        | 0.989             |
|                                         | GA/AA    | 8/43                 | 0.47 | (0.17, 1.31) | 0.148   |                  |              |                   |
| CD32_07_86                              | GG       | 20/104               | 0.38 | (0.2, 0.72)  | 0.003   | 0.057            | 0.354        | 0.626             |
|                                         | GA/AA    | 5/21                 | 0.01 | (0, 0.41)    | 0.016   |                  |              |                   |
| CD32_07_232                             | GG       | 9/37                 | 0.33 | (0.13, 0.84) | 0.021   | 0.812            | 0.938        | 1.000             |
|                                         | GA/AA    | 16/88                | 0.28 | (0.12, 0.67) | 0.004   |                  |              |                   |
| CD32_11_395                             | GG       | 18/84                | 0.34 | (0.17, 0.69) | 0.003   | 0.537            | 0.787        | 0.999             |
|                                         | GA/AA    | 7/40                 | 0.21 | (0.05, 0.87) | 0.031   |                  |              |                   |
| CD32_11_454                             | AA       | 10/38                | 0.21 | (0.06, 0.68) | 0.01    | 0.453            | 0.764        | 0.999             |
|                                         | AG/GG    | 15/86                | 0.36 | (0.17, 0.77) | 0.008   |                  |              |                   |
| CD32_12_392                             | GG       | 22/105               | 0.29 | (0.15, 0.59) | 0.001   | 0.862            | 0.943        | 1.000             |
|                                         | GA/AA    | 3/20                 | 0.34 | (0.07, 1.71) | 0.191   |                  |              |                   |
| CD32_12_477                             | CC       | 8/60                 | 0.38 | (0.14, 1.07) | 0.068   | 0.52             | 0.787        | 0.999             |
|                                         | CT/TT    | 17/65                | 0.25 | (0.11, 0.57) | 0.001   |                  |              |                   |
| CD32_13_258                             | AA       | 20/103               | 0.39 | (0.21, 0.73) | 0.003   | 0.056            | 0.354        | 0.618             |
|                                         | AG/GG    | 5/21                 | 0.01 | (0, 0.4)     | 0.015   |                  |              |                   |
| CD32_13_645                             | GG       | 9/60                 | 0.5  | (0.2, 1.3)   | 0.155   | 0.218            | 0.655        | 0.972             |
|                                         | GA/AA    | 16/64                | 0.22 | (0.1, 0.53)  | 0.001   |                  |              |                   |
| CD32_14_126                             | CC       | 13/77                | 0.35 | (0.16, 0.79) | 0.011   | 0.575            | 0.805        | 0.999             |
|                                         | CT/TT    | 12/46                | 0.24 | (0.09, 0.69) | 0.008   |                  |              |                   |

|                                          |       |       |      |              |       |       |       |       |
|------------------------------------------|-------|-------|------|--------------|-------|-------|-------|-------|
| CD32_14_261                              | TT    | 18/89 | 0.23 | (0.1, 0.53)  | 0.001 | 0.269 | 0.655 | 0.983 |
|                                          | TC/CC | 7/34  | 0.47 | (0.18, 1.22) | 0.12  |       |       |       |
| CD32_14_352                              | TT    | 8/48  | 0.48 | (0.19, 1.23) | 0.125 | 0.237 | 0.65  | 0.977 |
|                                          | TG/GG | 17/75 | 0.22 | (0.09, 0.53) | 0.001 |       |       |       |
| CD32_14_447                              | GG    | 16/91 | 0.28 | (0.12, 0.64) | 0.002 | 0.729 | 0.91  | 1.000 |
|                                          | GT/TT | 9/32  | 0.36 | (0.13, 0.99) | 0.047 |       |       |       |
| CD32_15_403<br>(FCGR2C-intron15-403-C/T) | CC    | 14/78 | 0.28 | (0.12, 0.63) | 0.002 | 0.746 | 0.91  | 1.000 |
|                                          | CT/TT | 11/47 | 0.34 | (0.13, 0.93) | 0.035 |       |       |       |
| CD32_15_433<br>(FCGR2C-intron15-433-G/A) | GG    | 12/75 | 0.29 | (0.12, 0.69) | 0.005 | 0.977 | 0.98  | 1.000 |
|                                          | GA/AA | 13/50 | 0.3  | (0.11, 0.8)  | 0.016 |       |       |       |

1. Janes HE, Cohen KW, Frahm N, De Rosa SC, Sanchez B, Hural J, et al. 2017. Higher T-Cell Responses Induced by DNA/rAd5 HIV-1 Preventive Vaccine Are Associated With Lower HIV-1 Infection Risk in an Efficacy Trial. J Infect Dis 215:1376-1385.

**Table S3.** Assessment of whether and how each FcγR SNP modified the inverse correlation of Env-specific IgG response with HIV-1 acquisition risk in HVTN 505 reported by Fong and Shen et al. (2).

| SNP                                     | Genotype | # case<br>/#controls | OR   | 95% CI       | P-value | Interaction Test |              |                   |
|-----------------------------------------|----------|----------------------|------|--------------|---------|------------------|--------------|-------------------|
|                                         |          |                      |      |              |         | P-value          | FDR(Q-value) | P <sub>FWER</sub> |
| CD16_01_448                             | GG       | 6/55                 | 0.83 | (0.29, 2.39) | 0.733   | 0.744            | 0.809        | 0.994             |
|                                         | GT/TT    | 19/70                | 0.68 | (0.4, 1.17)  | 0.167   |                  |              |                   |
| CD16_02_44<br>(FCGR3B-5'utr44-T/A)      | TT       | 10/44                | 0.38 | (0.16, 0.93) | 0.034   | 0.035            | 0.215        | 0.415             |
|                                         | TA/AA    | 12/80                | 1.41 | (0.62, 3.17) | 0.412   |                  |              |                   |
| CD16_02_99<br>(FCGR3B-5'utr99-C/G)      | CC       | 9/39                 | 0.3  | (0.1, 0.88)  | 0.028   | 0.028            | 0.215        | 0.347             |
|                                         | CG/GG    | 16/85                | 1.27 | (0.64, 2.53) | 0.502   |                  |              |                   |
| CD16_02_222<br>(FCGR3B-5'utr222-G/A)    | GG       | 10/44                | 0.37 | (0.15, 0.93) | 0.034   | 0.044            | 0.215        | 0.489             |
|                                         | GA/AA    | 13/80                | 1.28 | (0.59, 2.77) | 0.532   |                  |              |                   |
| CD16_02_385                             | AA       | 8/39                 | 0.35 | (0.13, 0.92) | 0.034   | 0.047            | 0.215        | 0.500             |
|                                         | AC/CC    | 15/85                | 1.16 | (0.57, 2.36) | 0.672   |                  |              |                   |
| CD16_02_425                             | TT       | 8/37                 | 0.33 | (0.12, 0.95) | 0.040   | 0.040            | 0.215        | 0.454             |
|                                         | TG/GG    | 14/88                | 1.28 | (0.61, 2.72) | 0.512   |                  |              |                   |
| CD16_02_473                             | GG       | 10/42                | 0.41 | (0.17, 1)    | 0.051   | 0.048            | 0.215        | 0.489             |
|                                         | GA/AA    | 14/83                | 1.34 | (0.63, 2.84) | 0.449   |                  |              |                   |
| CD16_09_626                             | TT       | 14/53                | 0.7  | (0.36, 1.37) | 0.300   | 0.986            | 0.986        | 0.994             |
|                                         | TG/GG    | 11/71                | 0.71 | (0.38, 1.34) | 0.289   |                  |              |                   |
| CD16_10_332                             | TT       | 21/99                | 0.61 | (0.36, 1.01) | 0.056   | 0.206            | 0.506        | 0.943             |
|                                         | TC/CC    | 3/24                 | 1.51 | (0.4, 5.72)  | 0.545   |                  |              |                   |
| CD16_10_885                             | GG       | 5/35                 | 0.91 | (0.19, 4.38) | 0.902   | 0.778            | 0.817        | 0.994             |
|                                         | GT/TT    | 20/90                | 0.72 | (0.45, 1.15) | 0.166   |                  |              |                   |
| CD16_13_268                             | GG       | 9/73                 | 0.79 | (0.36, 1.72) | 0.551   | 0.712            | 0.802        | 0.994             |
|                                         | GA/AA    | 16/52                | 0.65 | (0.35, 1.23) | 0.185   |                  |              |                   |
| CD32_04_275                             | CC       | 20/102               | 0.85 | (0.46, 1.57) | 0.600   | 0.448            | 0.639        | 0.992             |
|                                         | CT/TT    | 5/23                 | 0.57 | (0.25, 1.29) | 0.177   |                  |              |                   |
| CD32_04_276                             | AA       | 19/102               | 0.89 | (0.47, 1.66) | 0.704   | 0.431            | 0.639        | 0.990             |
|                                         | AG/GG    | 6/23                 | 0.59 | (0.27, 1.3)  | 0.191   |                  |              |                   |
| CD32_04_604                             | TT       | 20/102               | 0.85 | (0.46, 1.57) | 0.600   | 0.448            | 0.639        | 0.992             |
|                                         | TC/CC    | 5/23                 | 0.57 | (0.25, 1.29) | 0.177   |                  |              |                   |
| CD32_05_423                             | GG       | 14/84                | 1.14 | (0.56, 2.3)  | 0.717   | 0.054            | 0.215        | 0.516             |
|                                         | GA/AA    | 11/41                | 0.4  | (0.19, 0.92) | 0.031   |                  |              |                   |
| CD32_06_126<br>(FCGR2C-intron6-126-C/T) | CC       | 14/69                | 0.55 | (0.29, 1.03) | 0.063   | 0.111            | 0.376        | 0.785             |
|                                         | CT/TT    | 10/56                | 1.3  | (0.54, 3.11) | 0.553   |                  |              |                   |
| CD32_06_197<br>(FCGR2C-intron6-197-G/A) | GG       | 17/73                | 0.81 | (0.48, 1.38) | 0.444   | 0.511            | 0.665        | 0.994             |
|                                         | GA/AA    | 7/52                 | 0.57 | (0.23, 1.43) | 0.232   |                  |              |                   |
| CD32_06_441<br>(FCGR2C-exon6-441-C/T)   | CC       | 16/82                | 0.6  | (0.35, 1.05) | 0.075   | 0.162            | 0.461        | 0.900             |
|                                         | CT/TT    | 8/43                 | 1.37 | (0.49, 3.78) | 0.546   |                  |              |                   |
| CD32_06_590<br>(FCGR2C-intron6-590-G/A) | GG       | 16/82                | 0.6  | (0.35, 1.05) | 0.075   | 0.162            | 0.497        | 0.900             |
|                                         | GA/AA    | 8/43                 | 1.37 | (0.49, 3.78) | 0.546   |                  |              |                   |
| CD32_07_86                              | GG       | 20/104               | 0.85 | (0.46, 1.57) | 0.598   | 0.454            | 0.639        | 0.992             |
|                                         | GA/AA    | 5/21                 | 0.57 | (0.25, 1.29) | 0.180   |                  |              |                   |
| CD32_07_232                             | GG       | 9/37                 | 0.47 | (0.17, 1.35) | 0.163   | 0.370            | 0.639        | 0.984             |
|                                         | GA/AA    | 16/88                | 0.8  | (0.48, 1.34) | 0.399   |                  |              |                   |
| CD32_11_395                             | GG       | 18/84                | 0.64 | (0.36, 1.14) | 0.129   | 0.516            | 0.665        | 0.994             |
|                                         | GA/AA    | 7/40                 | 0.89 | (0.4, 1.99)  | 0.777   |                  |              |                   |
| CD32_11_454                             | AA       | 10/38                | 0.55 | (0.26, 1.18) | 0.125   | 0.299            | 0.583        | 0.974             |
|                                         | AG/GG    | 15/86                | 0.93 | (0.48, 1.8)  | 0.835   |                  |              |                   |
| CD32_12_392                             | GG       | 22/105               | 0.69 | (0.42, 1.14) | 0.148   | 0.648            | 0.761        | 0.994             |
|                                         | GA/AA    | 3/20                 | 0.92 | (0.29, 2.91) | 0.892   |                  |              |                   |
| CD32_12_477                             | CC       | 8/60                 | 1.15 | (0.4, 3.33)  | 0.791   | 0.291            | 0.583        | 0.974             |
|                                         | CT/TT    | 17/65                | 0.6  | (0.33, 1.08) | 0.089   |                  |              |                   |
| CD32_13_258                             | AA       | 20/103               | 0.85 | (0.46, 1.57) | 0.601   | 0.459            | 0.639        | 0.992             |
|                                         | AG/GG    | 5/21                 | 0.58 | (0.26, 1.3)  | 0.185   |                  |              |                   |
| CD32_13_645                             | GG       | 9/60                 | 1.66 | (0.6, 4.63)  | 0.329   | 0.036            | 0.215        | 0.416             |
|                                         | GA/AA    | 16/64                | 0.42 | (0.2, 0.88)  | 0.021   |                  |              |                   |
| CD32_14_126                             | CC       | 13/77                | 0.93 | (0.45, 1.92) | 0.851   | 0.186            | 0.498        | 0.932             |
|                                         | CT/TT    | 12/46                | 0.47 | (0.22, 1)    | 0.049   |                  |              |                   |

|                                          |       |       |      |              |       |       |       |       |
|------------------------------------------|-------|-------|------|--------------|-------|-------|-------|-------|
| CD32_14_261                              | TT    | 18/89 | 0.62 | (0.35, 1.1)  | 0.099 | 0.591 | 0.723 | 0.994 |
|                                          | TC/CC | 7/34  | 0.84 | (0.32, 2.17) | 0.713 |       |       |       |
| CD32_14_352                              | TT    | 8/48  | 1.08 | (0.37, 3.16) | 0.895 | 0.323 | 0.596 | 0.976 |
|                                          | TG/GG | 17/75 | 0.59 | (0.33, 1.04) | 0.067 |       |       |       |
| CD32_14_447                              | GG    | 16/91 | 0.89 | (0.46, 1.73) | 0.732 | 0.224 | 0.506 | 0.951 |
|                                          | GT/TT | 9/32  | 0.48 | (0.22, 1.05) | 0.065 |       |       |       |
| CD32_15_403<br>(FCGR2C-intron15-403-C/T) | CC    | 14/78 | 0.59 | (0.34, 1.04) | 0.069 | 0.230 | 0.506 | 0.951 |
|                                          | CT/TT | 11/47 | 1.11 | (0.46, 2.67) | 0.812 |       |       |       |
| CD32_15_433<br>(FCGR2C-intron15-433-G/A) | GG    | 12/75 | 0.52 | (0.28, 0.96) | 0.036 | 0.083 | 0.308 | 0.683 |
|                                          | GA/AA | 13/50 | 1.29 | (0.56, 3.01) | 0.551 |       |       |       |

- Fong Y, Shen X, Ashley VC, Deal A, Seaton KE, Yu C, et al. 2018. Modification of the Association Between T-Cell Immune Responses and Human Immunodeficiency Virus Type 1 Infection Risk by Vaccine-Induced Antibody Responses in the HVTN 505 Trial. *J Infect Dis* 217:1280-1288.

**Table S4.** Assessment of whether and how each FcγR SNP modified the correlation of IgG and Env-specific CD8+ PFS (high or median IgG or CD8 vs. low on both IgG and CD8) with the risk of HIV-1 acquisition in HVTN 505 (2).

| SNP                                     | Genotype | # case<br>/#controls | OR   | 95% CI       | P-value | Interaction Test |               |                   |
|-----------------------------------------|----------|----------------------|------|--------------|---------|------------------|---------------|-------------------|
|                                         |          |                      |      |              |         | P-value          | FDR (Q-value) | P <sub>FWER</sub> |
| CD16_01_448                             | GG       | 6/55                 | 0.21 | (0.03, 1.38) | 0.104   | 0.338            | 0.290         | 0.845             |
|                                         | GT/TT    | 19/70                | 0.06 | (0.01, 0.26) | 0.0001  |                  |               |                   |
| CD16_02_44<br>(FCGR3B-5'utr44-T/A)      | TT       | 10/44                | 0.02 | (0, 0.15)    | 0.0002  | 0.044            | 0.094         | 0.233             |
|                                         | TA/AA    | 12/80                | 0.24 | (0.06, 0.99) | 0.049   |                  |               |                   |
| CD16_02_99<br>(FCGR3B-5'utr99-T/A)      | CC       | 9/39                 | 0.01 | (0, 0.15)    | 0.001   | 0.041            | 0.094         | 0.215             |
|                                         | CG/GG    | 16/85                | 0.22 | (0.06, 0.78) | 0.019   |                  |               |                   |
| CD16_02_222<br>(FCGR3B-5'utr222-T/A)    | GG       | 10/44                | 0.02 | (0, 0.14)    | 0.0002  | 0.051            | 0.094         | 0.275             |
|                                         | GA/AA    | 13/80                | 0.21 | (0.05, 0.8)  | 0.023   |                  |               |                   |
| CD16_02_385                             | AA       | 8/39                 | 0.02 | (0, 0.21)    | 0.001   | 0.143            | 0.159         | 0.641             |
|                                         | AC/CC    | 15/85                | 0.16 | (0.04, 0.58) | 0.005   |                  |               |                   |
| CD16_02_425<br>(FCGR3B-5'utr425-T/G)    | TT       | 8/37                 | 0.01 | (0, 0.11)    | 0.0005  | 0.027            | 0.094         | 0.142             |
|                                         | TG/GG    | 14/88                | 0.22 | (0.06, 0.83) | 0.025   |                  |               |                   |
| CD16_02_473<br>(FCGR3B-5'utr473-G/A)    | GG       | 10/42                | 0.02 | (0, 0.16)    | 0.0002  | 0.051            | 0.094         | 0.262             |
|                                         | GA/AA    | 14/83                | 0.23 | (0.06, 0.88) | 0.032   |                  |               |                   |
| CD16_09_626                             | TT       | 14/53                | 0.13 | (0.03, 0.58) | 0.008   | 0.778            | 0.539         | 0.863             |
|                                         | TG/GG    | 11/71                | 0.09 | (0.02, 0.42) | 0.002   |                  |               |                   |
| CD16_10_332                             | TT       | 21/99                | 0.09 | (0.03, 0.29) | 0.0001  | 0.464            | 0.338         | 0.863             |
|                                         | TC/CC    | 3/24                 | 0.28 | (0.02, 4.41) | 0.363   |                  |               |                   |
| CD16_10_885                             | GG       | 5/35                 | 0.11 | (0.01, 1.03) | 0.053   | 0.94             | 0.893         | 0.863             |
|                                         | GT/TT    | 20/90                | 0.12 | (0.04, 0.38) | 0.0003  |                  |               |                   |
| CD16_13_268                             | GG       | 9/73                 | 0.17 | (0.04, 0.85) | 0.031   | 0.42             | 0.328         | 0.863             |
|                                         | GA/AA    | 16/52                | 0.07 | (0.01, 0.33) | 0.001   |                  |               |                   |
| CD32_04_275                             | CC       | 20/102               | 0.17 | (0.05, 0.54) | 0.003   | 0.157            | 0.159         | 0.647             |
|                                         | CT/TT    | 5/23                 | 0.02 | (0, 0.31)    | 0.005   |                  |               |                   |
| CD32_04_276                             | AA       | 19/102               | 0.2  | (0.06, 0.66) | 0.008   | 0.087            | 0.124         | 0.435             |
|                                         | AG/GG    | 6/23                 | 0.02 | (0, 0.23)    | 0.002   |                  |               |                   |
| CD32_04_604                             | TT       | 20/102               | 0.17 | (0.05, 0.54) | 0.003   | 0.157            | 0.159         | 0.647             |
|                                         | TC/CC    | 5/23                 | 0.02 | (0, 0.31)    | 0.005   |                  |               |                   |
| CD32_05_423                             | GG       | 14/84                | 0.23 | (0.06, 0.84) | 0.027   | 0.07             | 0.119         | 0.360             |
|                                         | GA/AA    | 11/41                | 0.02 | (0, 0.18)    | 0.0005  |                  |               |                   |
| CD32_06_126<br>(FCGR2C-intron6-126-C/T) | CC       | 14/69                | 0.09 | (0.02, 0.36) | 0.001   | 0.38             | 0.290         | 0.856             |
|                                         | CT/TT    | 10/56                | 0.26 | (0.04, 1.6)  | 0.145   |                  |               |                   |
| CD32_06_197<br>(FCGR2C-intron6-197-G/A) | GG       | 17/73                | 0.08 | (0.02, 0.34) | 0.001   | 0.359            | 0.290         | 0.856             |
|                                         | GA/AA    | 7/52                 | 0.24 | (0.04, 1.39) | 0.110   |                  |               |                   |
| CD32_06_441<br>(FCGR2C-exon6-441-C/T)   | CC       | 16/82                | 0.08 | (0.02, 0.28) | 0.0001  | 0.137            | 0.159         | 0.612             |
|                                         | CT/TT    | 8/43                 | 0.51 | (0.06, 4.08) | 0.523   |                  |               |                   |
| CD32_06_590<br>(FCGR2C-intron6-590-G/A) | GG       | 16/82                | 0.08 | (0.02, 0.28) | 0.000   | 0.137            | 0.159         | 0.612             |
|                                         | GA/AA    | 8/43                 | 0.51 | (0.06, 4.08) | 0.523   |                  |               |                   |
| CD32_07_86                              | GG       | 20/104               | 0.17 | (0.05, 0.53) | 0.002   | 0.173            | 0.159         | 0.678             |
|                                         | GA/AA    | 5/21                 | 0.02 | (0, 0.34)    | 0.006   |                  |               |                   |
| CD32_07_232                             | GG       | 9/37                 | 0.06 | (0.01, 0.42) | 0.005   | 0.442            | 0.336         | 0.863             |
|                                         | GA/AA    | 16/88                | 0.15 | (0.04, 0.53) | 0.003   |                  |               |                   |
| CD32_11_395                             | GG       | 18/84                | 0.09 | (0.02, 0.33) | 0.0003  | 0.651            | 0.465         | 0.863             |
|                                         | GA/AA    | 7/40                 | 0.15 | (0.02, 0.97) | 0.046   |                  |               |                   |
| CD32_11_454                             | AA       | 10/38                | 0.08 | (0.01, 0.41) | 0.003   | 0.489            | 0.353         | 0.863             |
|                                         | AG/GG    | 15/86                | 0.17 | (0.04, 0.65) | 0.010   |                  |               |                   |
| CD32_12_392                             | GG       | 22/105               | 0.12 | (0.04, 0.38) | 0.0002  | 0.733            | 0.519         | 0.863             |
|                                         | GA/AA    | 3/20                 | 0.07 | (0, 1.84)    | 0.110   |                  |               |                   |
| CD32_12_477                             | CC       | 8/60                 | 0.32 | (0.05, 1.82) | 0.197   | 0.134            | 0.159         | 0.612             |
|                                         | CT/TT    | 17/65                | 0.05 | (0.01, 0.23) | 0.0001  |                  |               |                   |
| CD32_13_258                             | AA       | 20/103               | 0.17 | (0.05, 0.54) | 0.003   | 0.169            | 0.159         | 0.670             |
|                                         | AG/GG    | 5/21                 | 0.02 | (0, 0.33)    | 0.006   |                  |               |                   |
| CD32_13_645                             | GG       | 9/60                 | 0.47 | (0.08, 2.69) | 0.393   | 0.044            | 0.094         | 0.233             |
|                                         | GA/AA    | 16/64                | 0.03 | (0.01, 0.18) | 0.0001  |                  |               |                   |
| CD32_14_126                             | CC       | 13/77                | 0.17 | (0.04, 0.65) | 0.010   | 0.272            | 0.253         | 0.810             |



|                                          |       |       |      |              |        |       |       |       |
|------------------------------------------|-------|-------|------|--------------|--------|-------|-------|-------|
|                                          | CT/TT | 12/46 | 0.05 | (0.01, 0.29) | 0.001  |       |       |       |
| CD32_14_261                              | TT    | 18/89 | 0.07 | (0.02, 0.28) | 0.0001 | 0.289 | 0.260 | 0.812 |
|                                          | TC/CC | 7/34  | 0.27 | (0.04, 1.91) | 0.191  |       |       |       |
| CD32_14_352                              | TT    | 8/48  | 0.16 | (0.03, 0.98) | 0.048  | 0.609 | 0.445 | 0.863 |
|                                          | TG/GG | 17/75 | 0.09 | (0.02, 0.33) | 0.0003 |       |       |       |
| CD32_14_447                              | GG    | 16/91 | 0.16 | (0.05, 0.57) | 0.004  | 0.238 | 0.227 | 0.776 |
|                                          | GT/TT | 9/32  | 0.04 | (0, 0.31)    | 0.003  |       |       |       |
| CD32_15_403<br>(FCGR2C-intron15-403-C/T) | CC    | 14/78 | 0.08 | (0.02, 0.3)  | 0.0002 | 0.362 | 0.290 | 0.856 |
|                                          | CT/TT | 11/47 | 0.21 | (0.04, 1.14) | 0.071  |       |       |       |
| CD32_15_433<br>(FCGR2C-intron15-433-G/A) | GG    | 12/75 | 0.04 | (0.01, 0.2)  | 0.0001 | 0.084 | 0.124 | 0.423 |
|                                          | GA/AA | 13/50 | 0.31 | (0.06, 1.55) | 0.155  |       |       |       |

- Fong Y, Shen X, Ashley VC, Deal A, Seaton KE, Yu C, et al. 2018. Modification of the Association Between T-Cell Immune Responses and Human Immunodeficiency Virus Type 1 Infection Risk by Vaccine-Induced Antibody Responses in the HVTN 505 Trial. *J Infect Dis* 217:1280-1288.

**Table S5.** List of significant eQTLs for the SNPs identified from this analysis of FcyR SNPs in HVTN 505 samples

**Table S6.** The detailed list of SNPs in high LD with the SNPs identified from this analysis of FcyR SNPs in HVTN 505 samples

**Table S7.** Summary of predicted consequences for SNPs in high LD with the SNPs identified from this analysis of FcyR SNPs in HVTN 505 samples
